# Supplementary material for: A mitochondria-anchored isoform of the actin-nucleating spire protein regulates mitochondrial division
Source: eLife journal article supplement (doi:10.7554/elife.08828), 2015-08-25
Supplement: supp [file elife-08828-supp-v1.zip]

# Figure 1-figure supplement 1

A

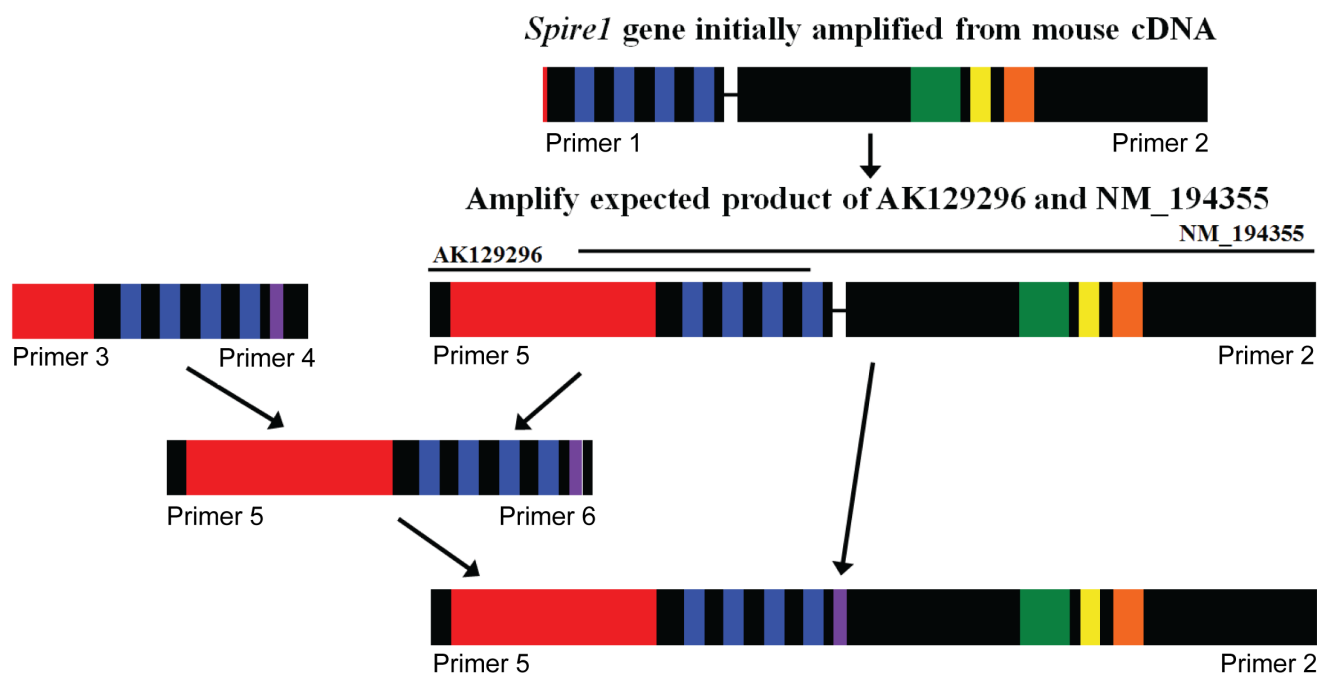

B

Mouse *spire1* containing all exons (802 a.a.)

| Domain                                                                                                         | Residues | Function                                                                     |
|----------------------------------------------------------------------------------------------------------------|----------|------------------------------------------------------------------------------|
|  KIND<br>(alternate exon A) | 24-218   | Kinase-non catalytic C-lobe domain; putative signaling domain                |
|  WH2 repeats                | 255-373  | Wiskott-Aldrich syndrome protein (WASP) homology 2 domains; actin nucleation |
|  Alternate exon B           | 384-397  | ?                                                                            |
|  Alternate exon C           | 535-592  | Mitochondrial targeting*                                                     |
|  Spir box                   | 602-622  | Potential Rab 3a interaction domain and membrane targeting                   |
|  mFYVE                      | 634-669  | Predicted membrane binding (PI <sub>3</sub> P)                               |
|  Uncharacterized            |          | ?                                                                            |

\* Previously uncharacterized domain; novel function found in this study
