# Supplementary material for: A mitochondria-anchored isoform of the actin-nucleating spire protein regulates mitochondrial division
Source: eLife journal article supplement (doi:10.7554/elife.08828), 2015-08-25

# Figure 1-figure supplement 2

A

|                                                                                     | Construct name  | Backbone vector | Tag(s) and protease site(s)              | Tag position | Residues            | Use                    | Experiment                          |
|-------------------------------------------------------------------------------------|-----------------|-----------------|------------------------------------------|--------------|---------------------|------------------------|-------------------------------------|
|     | Myc-Spire       | pCS2+           | 6x myc                                   | N-term       | 1-802               | Mammalian expression   | Expression and localization studies |
|    | Myc-Spire ΔKIND | pCS2+           | 6x myc                                   | N-term       | 216-383;<br>398-802 | Mammalian expression   | Expression and localization studies |
|     | Myc-Spire ΔB    | pCS2+           | 6x myc                                   | N-term       |                     | Mammalian expression   | Expression and localization studies |
|     | Myc-Spire ΔC    | pCS2+           | 6x myc                                   | N-term       | 1-534;<br>593-802   | Mammalian expression   | Expression and localization studies |
|    | GFP-Spire ΔKIND | pCS2+           | GFP                                      | N-term       | 216-383;<br>398-802 | Mammalian expression   | Expression and localization studies |
|    | GFP-Exon C      | pCS2+           | GFP                                      | N-term       | 535-592             | Mammalian expression   | Expression and localization studies |
|    | pET-C-term      | pET21           | Avidin-6 x his-MBP-TEV-3x FLAG-Precision | N-term       | 751-802             | Bacterial purification | Antibody production                 |
|  | pET-Exon C      | pET21           | Avidin-6 x his-MBP-TEV-3x FLAG-Precision | N-term       | 535-592             | Bacterial purification | Antibody production                 |
|  | GST-C-term      | pGEX6p          | GST                                      | N-term       | 751-802             | Bacterial purification | Antibody purification               |
|  | GST-EC          | pGEX6p          | GST                                      | N-term       | 535-592             |                        | Antibody purification               |

B

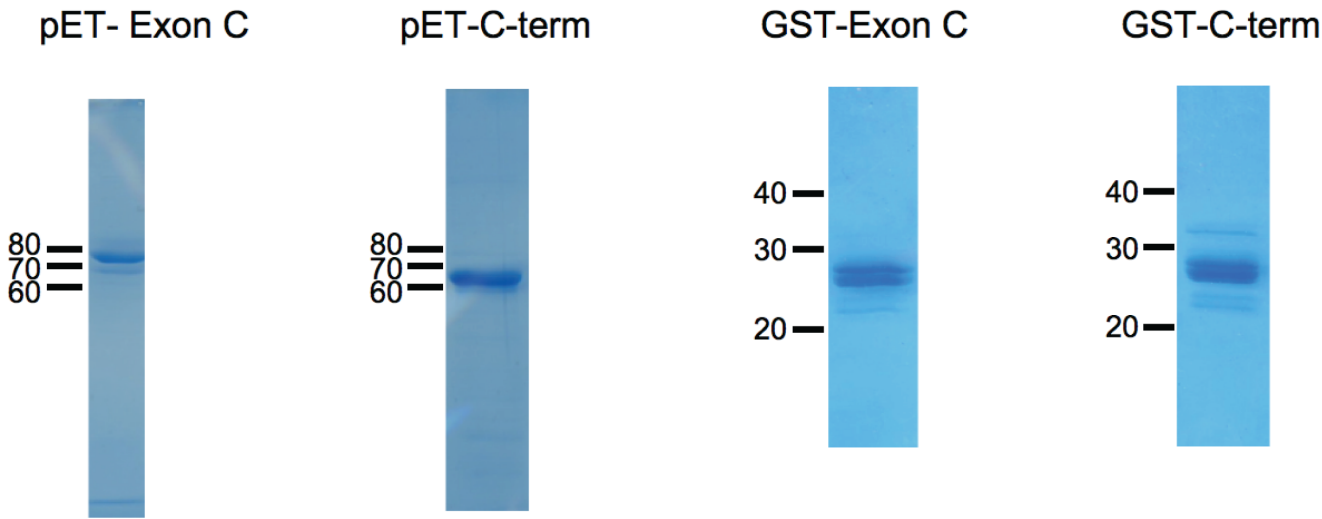

Supplement: supp [file elife-08828-supp-v1.zip]
