# Supplementary figures and images for: A mitochondria-anchored isoform of the actin-nucleating spire protein regulates mitochondrial division
Source: eLife journal article supplement (doi:10.7554/elife.08828), 2015-08-25

# Figure 4-figure supplement 1

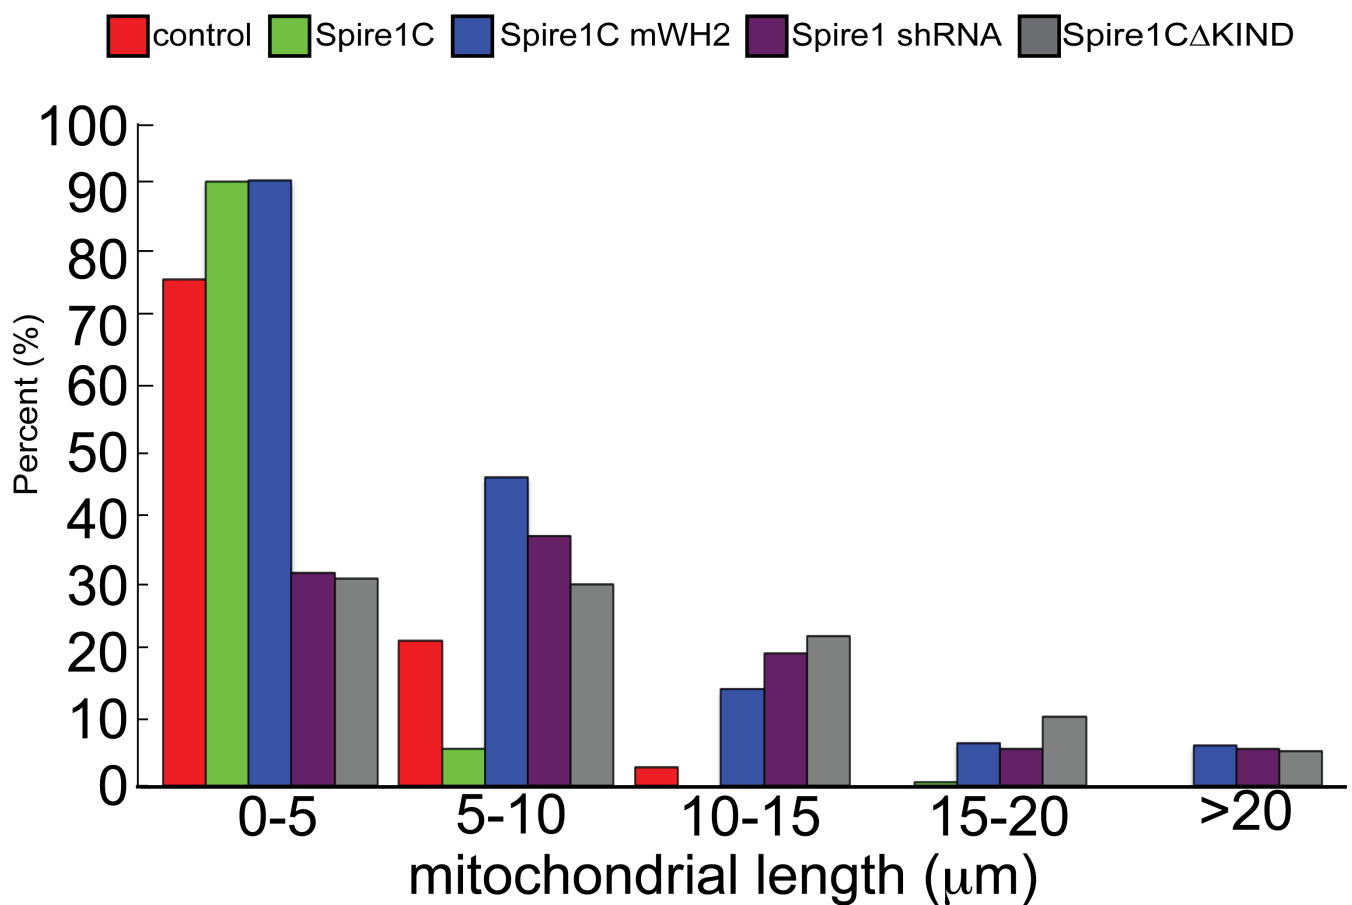

Supplement: supp [file elife-08828-supp-v1.zip]

# Figure 8-figure supplement 1

A

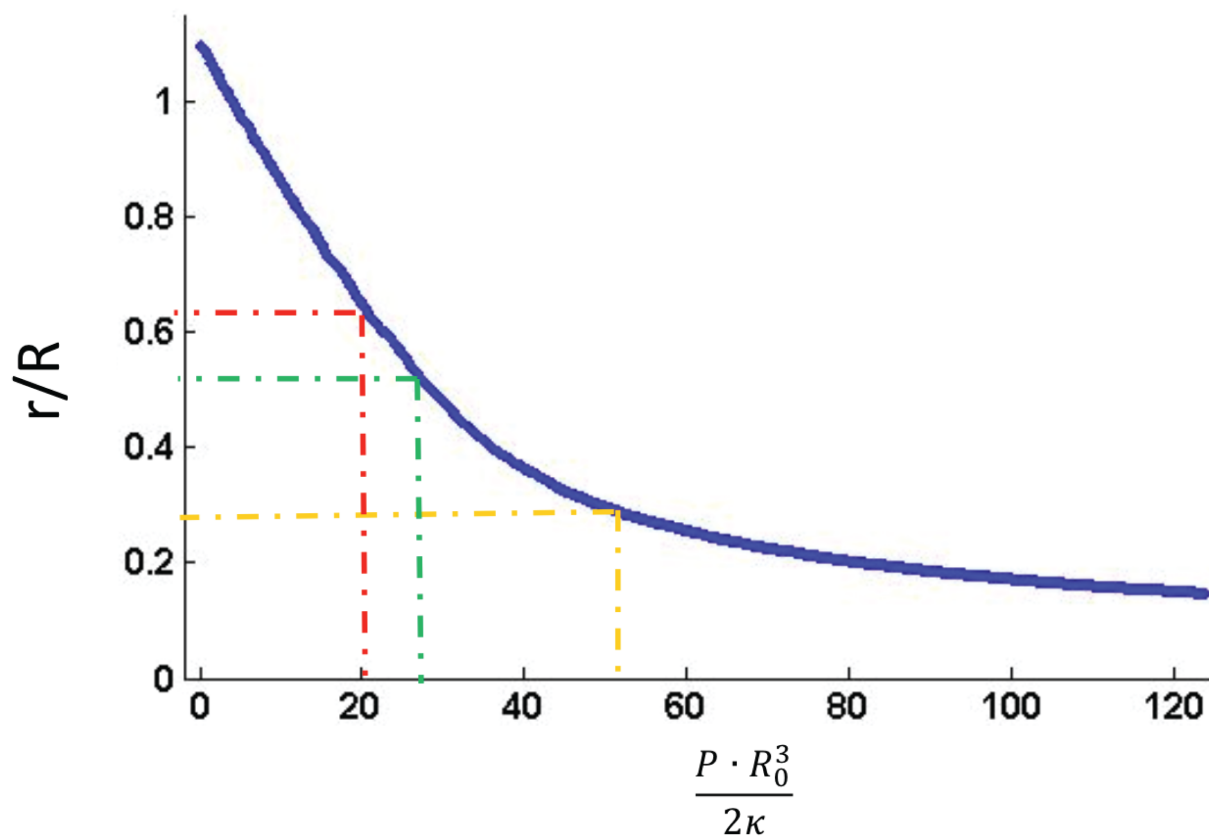

B

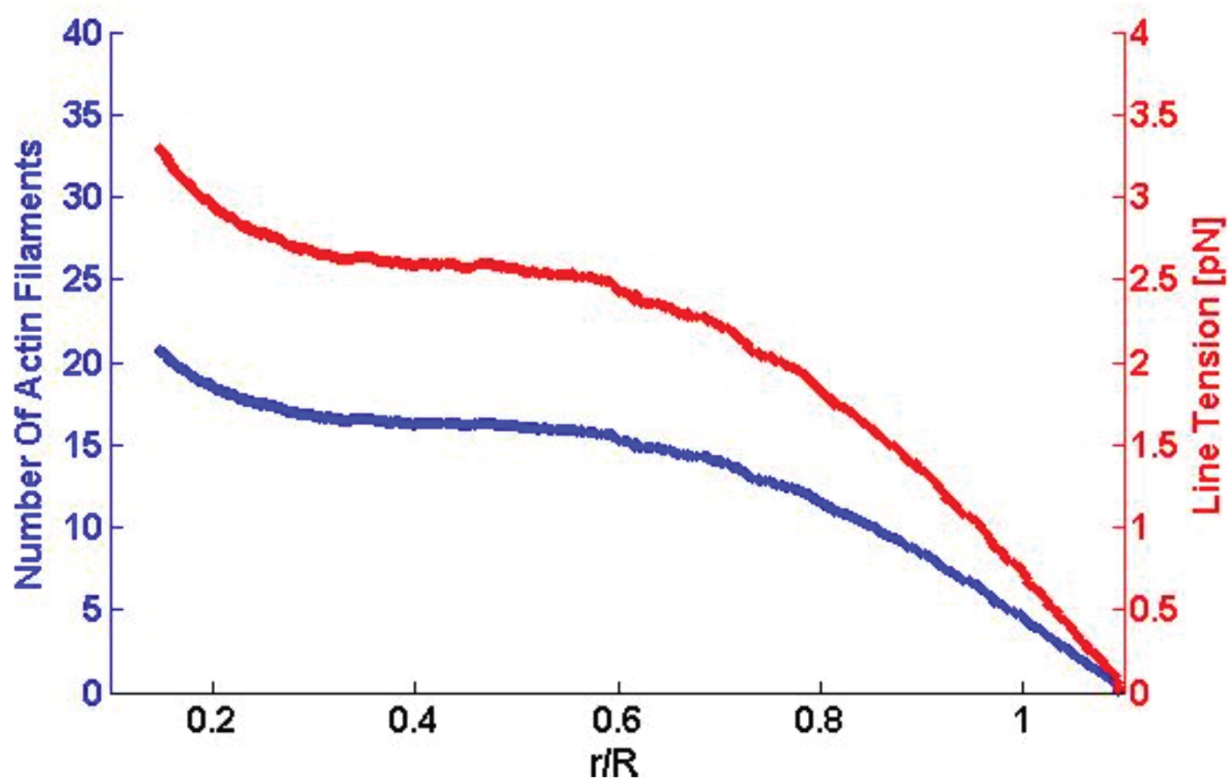

Supplement: supp [file elife-08828-supp-v1.zip]

Figure 1-figure supplement 3

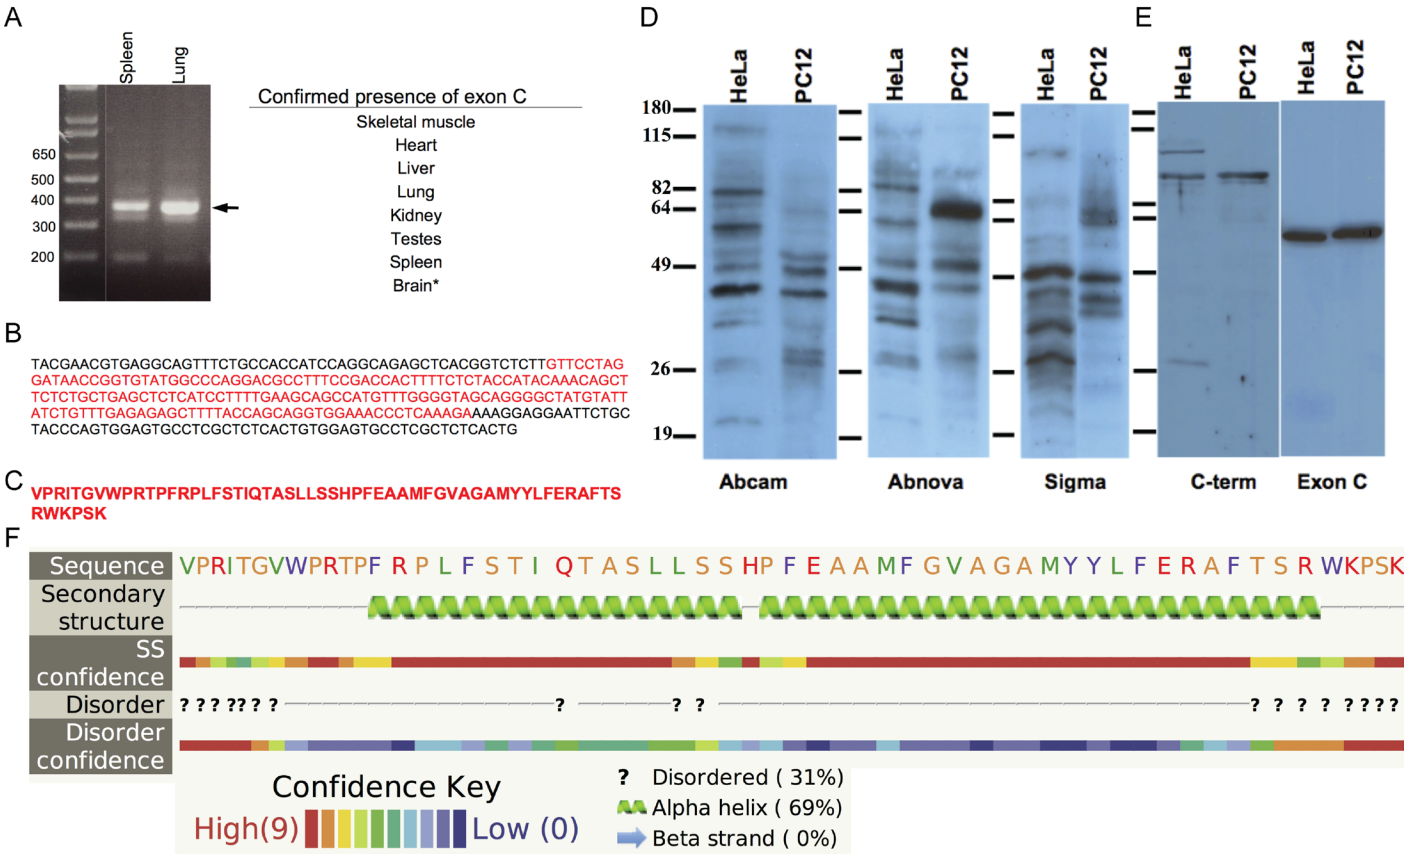

Supplement: supp [file elife-08828-supp-v1.zip]

Figure 2-figure supplement 1

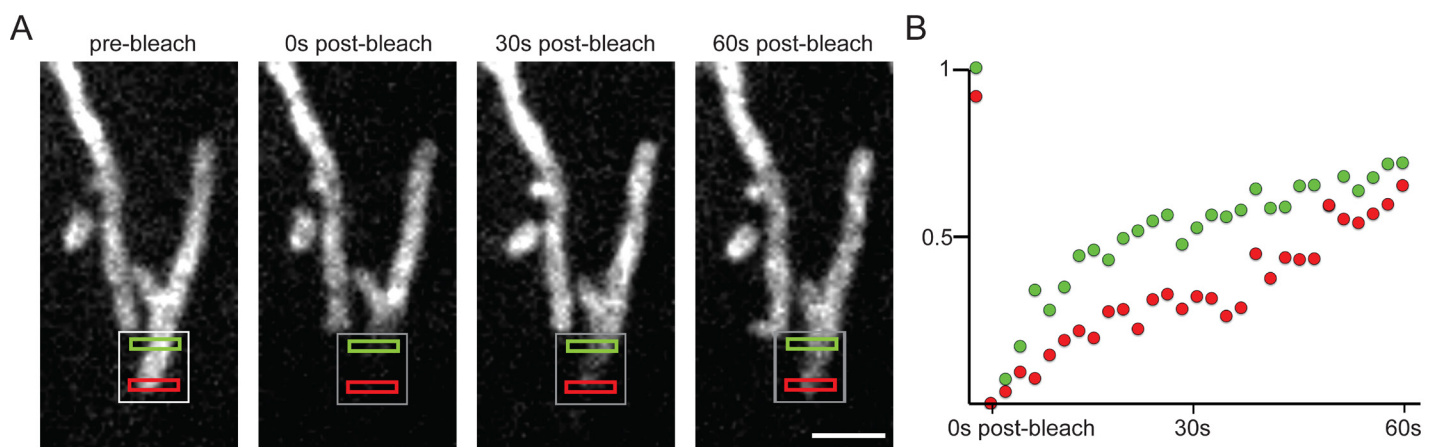

Supplement: supp [file elife-08828-supp-v1.zip]

# Figure 3-figure supplement 1

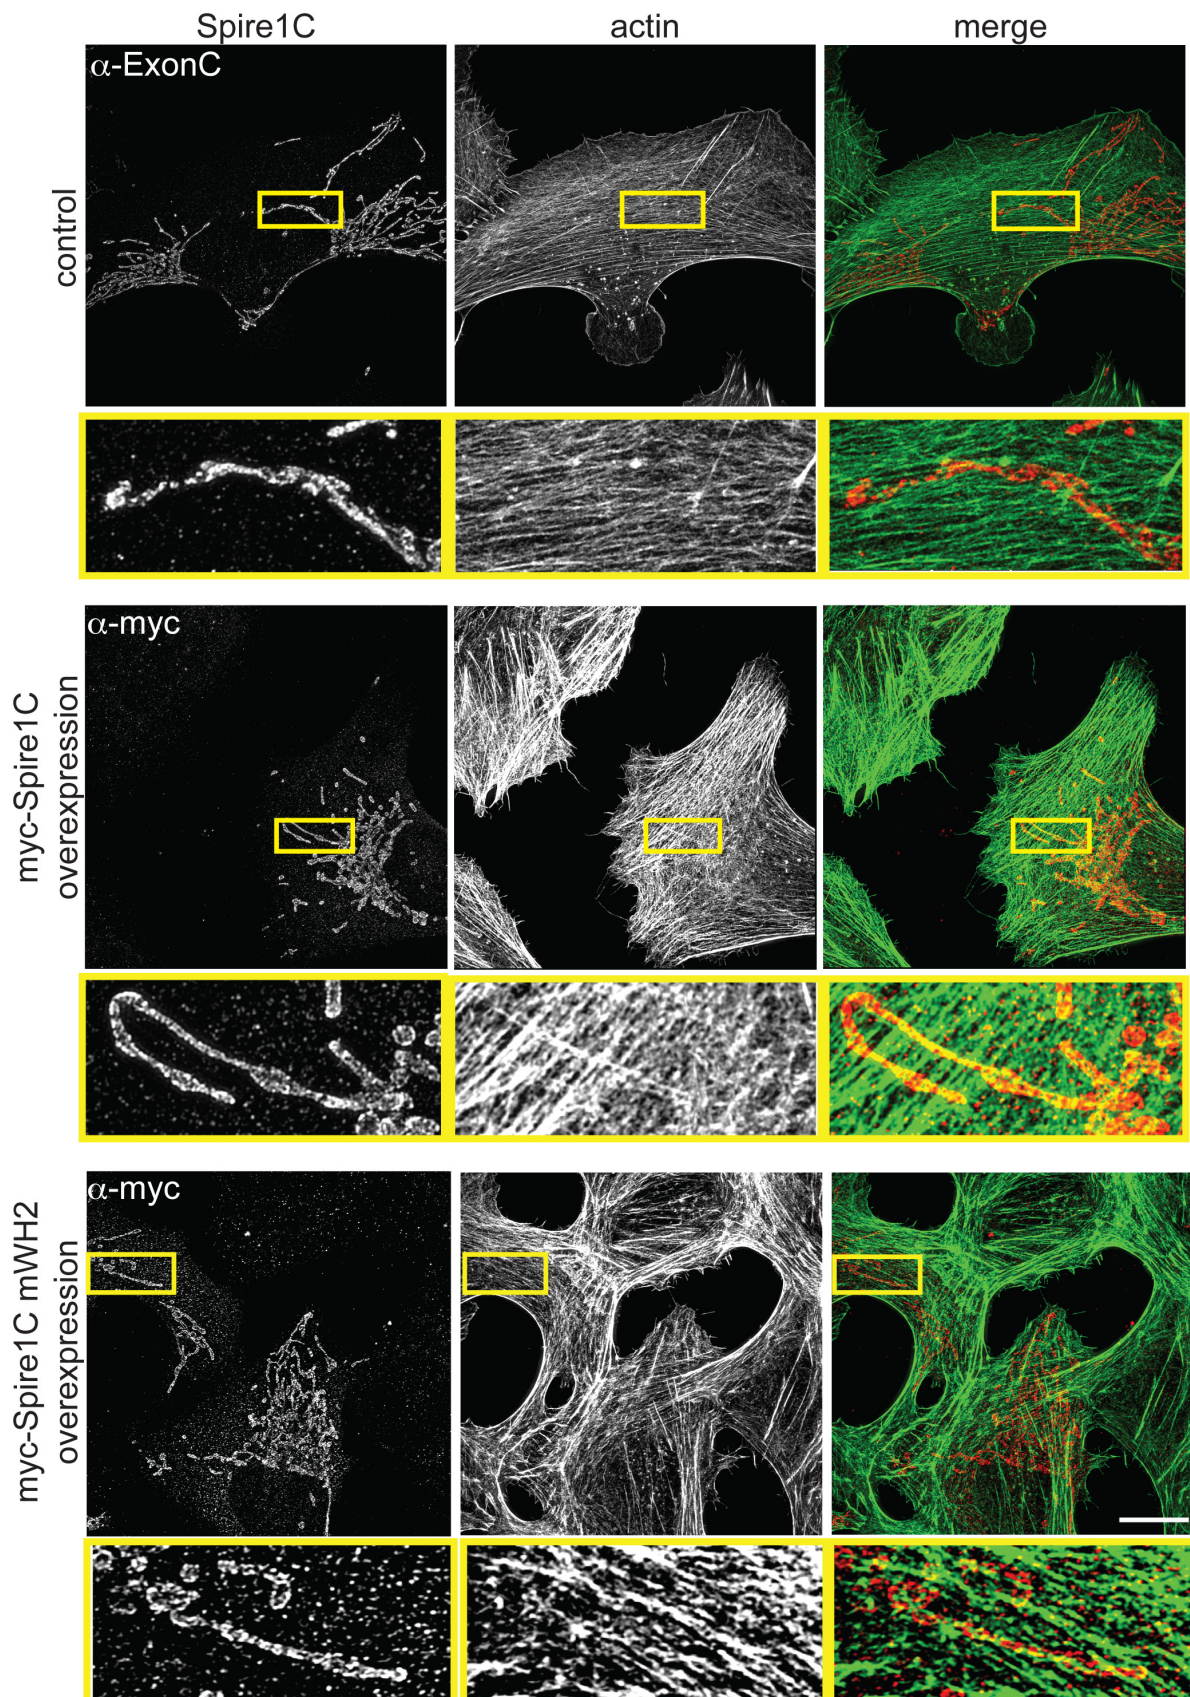

Supplement: supp [file elife-08828-supp-v1.zip]
